# Supplementary material for: The Synergy between Glutathione and Phenols—Phenolic Antioxidants Repair Glutathione: Closing the Virtuous Circle—A Theoretical Insight
Source: MDPI journal article supplement (doi:10.3390/antiox12051125), 2023-05-19
Supplement: s1 [file s1]

## **Supplementary Materials for:**

# **The Synergy between Glutathione and Phenols— Phenolic Antioxidants Repair Glutathione: Closing the Virtuous Circle—A Theoretical Insight**

**Mirzam Carreon-Gonzalez and Juan Raúl Alvarez-Idaboy \***

Departamento de Física y Química Teórica, Facultad de Química, Universidad Nacional Autónoma de México, Mexico City 04510, Mexico

### **Contents:**

SOMO and HOMO orbitals at the TS geometries of the GS• radical and piceatannol reaction: Figure S1.

Optimized molecular geometries of the transition states of GS• radical and piceatannol reaction in Cartesian coordinates (Angstroms): Table S1

SOMO and HOMO orbitals at the TS geometries of the GS<sup>•</sup> radical and piceatannol reaction:

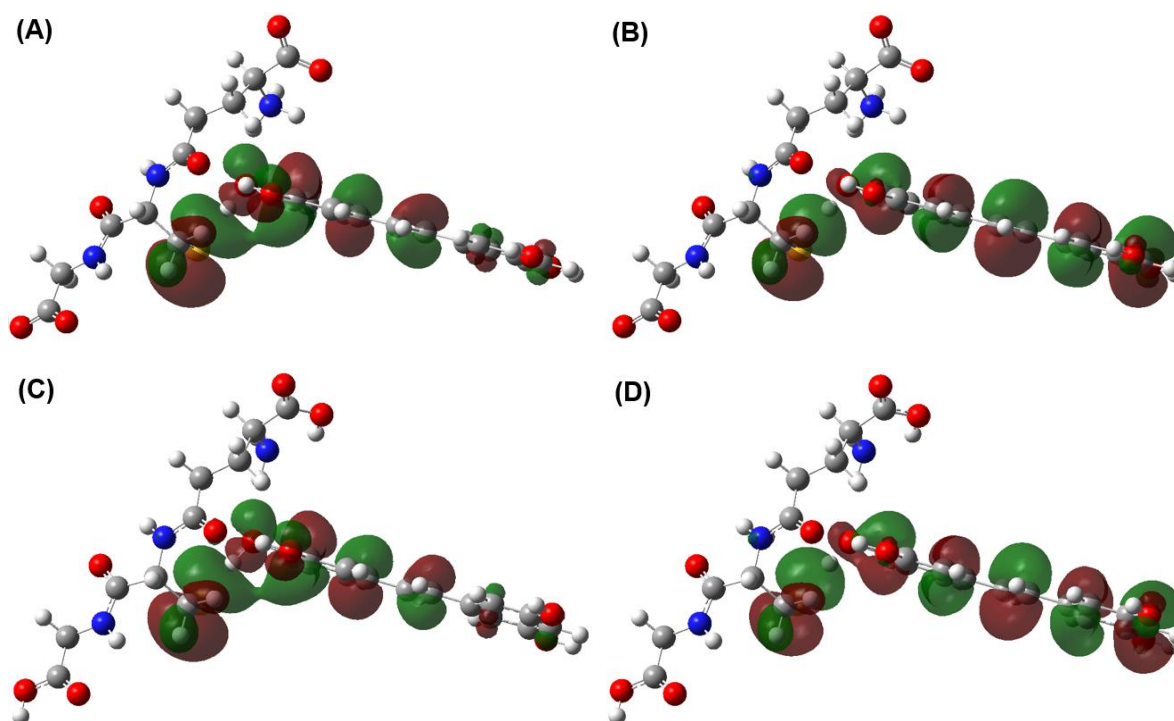

**Figure S1.** Molecular orbitals. (A) SOMO and (B) HOMO density surfaces at the transition state geometry for the proton coupled–electron transfer (PCET) reaction between the GS<sup>•</sup> radical and piceatannol in aqueous medium, (C) and (D) are respectively the SOMO and HOMO in lipid medium. Computed with isodensity value of 0.02 a.u

**Table S1. Optimized molecular geometries of the transition states of GS<sup>•</sup> radical and piceatannol reaction in Cartesian coordinates (Angstroms):**

Structure for GS<sup>•</sup>-piceatannol transition state in aqueous medium, optimized at M06-2X/ 6-311++ G(d,p) level:

|   |             |             |             |
|---|-------------|-------------|-------------|
| C | -3.47113800 | -1.30427000 | 0.54382500  |
| H | -2.66176200 | -1.00453700 | 1.21078100  |
| H | -3.82732500 | -2.27595800 | 0.89421900  |
| S | -2.80190900 | -1.53208000 | -1.12818300 |
| H | -1.73742300 | -0.11786400 | -1.01100900 |
| O | -1.11145400 | 0.69190900  | -0.69279100 |
| C | 0.14836500  | 0.31653400  | -0.47496000 |
| C | 0.60545700  | 0.18972400  | 0.86214100  |
| C | 1.03810400  | 0.07025400  | -1.53772500 |
| C | 1.93131200  | -0.14539800 | 1.10082200  |
| C | 2.34395500  | -0.26908200 | -1.29119800 |
| H | 2.27097000  | -0.22829800 | 2.12718000  |
| H | 3.00927100  | -0.45407300 | -2.12425900 |
| C | -4.60770500 | -0.27132700 | 0.62372700  |
| H | -4.91424700 | -0.19018700 | 1.67085700  |
| C | -5.81620500 | -0.71255300 | -0.20143400 |
| O | -6.18475300 | -0.07876600 | -1.19494800 |
| N | -6.42434200 | -1.82077000 | 0.21858600  |
| H | -6.09939200 | -2.31705700 | 1.04130300  |
| C | -7.55243300 | -2.39986900 | -0.48224000 |
| H | -8.39307600 | -1.70179800 | -0.50329900 |

|   |             |             |             |
|---|-------------|-------------|-------------|
| H | -7.28575500 | -2.62480500 | -1.51786900 |
| C | -8.01534000 | -3.69431400 | 0.19123100  |
| O | -7.40278200 | -4.07894900 | 1.21512000  |
| O | -8.98925100 | -4.26733600 | -0.35438300 |
| N | -4.20107900 | 1.03240600  | 0.13975700  |
| C | -3.27124300 | 1.78042700  | 0.74503800  |
| H | -4.53580800 | 1.29792700  | -0.77943400 |
| O | -2.77806300 | 1.45779800  | 1.83605800  |
| C | -2.87363300 | 3.04673900  | 0.02027400  |
| H | -2.87216500 | 2.83279600  | -1.05219000 |
| H | -3.66445000 | 3.78530600  | 0.18169800  |
| C | -1.53221400 | 3.60429200  | 0.50109500  |
| H | -0.86447900 | 2.79942800  | 0.82053400  |
| H | -1.68498600 | 4.25267300  | 1.36412200  |
| C | -0.81085900 | 4.41192300  | -0.57440200 |
| H | -1.48811100 | 5.09588800  | -1.08421600 |
| C | 0.35742800  | 5.20029700  | 0.05074700  |
| O | 0.04106600  | 6.23671400  | 0.67159400  |
| O | 1.50369700  | 4.71257600  | -0.08496200 |
| N | -0.24350900 | 3.48010100  | -1.60023400 |
| H | -0.84963400 | 2.67375700  | -1.78757400 |
| H | -0.05999300 | 3.96385600  | -2.48239100 |
| O | -0.21529100 | 0.38863800  | 1.90632500  |
| H | -1.10266700 | 0.69760000  | 1.62948200  |
| H | 0.65854400  | 3.13617400  | -1.24287300 |

|   |             |             |             |
|---|-------------|-------------|-------------|
| H | 0.65905800  | 0.16104200  | -2.54954600 |
| C | 2.81675300  | -0.37698000 | 0.04440300  |
| C | 4.19400700  | -0.72383200 | 0.36763200  |
| H | 4.40701300  | -0.80560400 | 1.42945700  |
| C | 5.17420400  | -0.93859400 | -0.52937600 |
| H | 4.96152500  | -0.85872700 | -1.59130300 |
| C | 6.56160700  | -1.29103800 | -0.21433700 |
| C | 7.04537900  | -1.36512300 | 1.10067200  |
| C | 7.41836400  | -1.56181900 | -1.28470300 |
| C | 8.37077500  | -1.71259700 | 1.31737200  |
| H | 6.41110400  | -1.15155800 | 1.95316300  |
| C | 8.74405400  | -1.91071000 | -1.03955100 |
| H | 7.06016200  | -1.50663800 | -2.30606700 |
| C | 9.23417500  | -1.98895700 | 0.25700700  |
| O | 8.90056300  | -1.80043300 | 2.57670100  |
| O | 9.53638300  | -2.16943300 | -2.12489900 |
| H | 10.26740700 | -2.25703800 | 0.44820300  |
| H | 8.22400500  | -1.58659400 | 3.23180000  |
| H | 10.42534000 | -2.40870500 | -1.83348800 |

Structure for GS<sup>•</sup>-piceatannol transition state in lipid medium (pentylethanoate), optimized at M06-2X/6-311++ G(d,p) level:

|   |             |             |            |
|---|-------------|-------------|------------|
| C | -3.29113000 | -1.35716600 | 0.33065400 |
| H | -2.39883200 | -1.13702200 | 0.91801400 |
| H | -3.56700700 | -2.39055900 | 0.55574500 |

|   |             |             |             |
|---|-------------|-------------|-------------|
| S | -2.87735300 | -1.26877700 | -1.43317900 |
| H | -1.74633900 | 0.09386200  | -1.25448600 |
| O | -1.05425500 | 0.83967800  | -0.92020400 |
| C | 0.20407100  | 0.40472200  | -0.89552100 |
| C | 0.85640300  | 0.26490600  | 0.36379900  |
| C | 0.90416000  | 0.10486600  | -2.07601600 |
| C | 2.18977200  | -0.12245600 | 0.40030800  |
| C | 2.21596100  | -0.29582400 | -2.01993200 |
| C | 2.88825000  | -0.40747200 | -0.77495600 |
| H | 2.65690000  | -0.20905000 | 1.37335900  |
| H | 2.75467400  | -0.52551800 | -2.93195200 |
| C | -4.41696400 | -0.39775100 | 0.75779200  |
| H | -4.53267000 | -0.47734800 | 1.84430100  |
| C | -5.75302300 | -0.75597300 | 0.10106600  |
| O | -6.33395200 | 0.01098900  | -0.64920600 |
| N | -6.23220400 | -1.97607300 | 0.40918800  |
| H | -5.75840300 | -2.57456600 | 1.07396200  |
| C | -7.47267400 | -2.44963700 | -0.15303000 |
| H | -8.30293700 | -1.77721200 | 0.08275800  |
| H | -7.41491100 | -2.52397300 | -1.24321000 |
| C | -7.78168100 | -3.81332800 | 0.40601400  |
| O | -7.09194700 | -4.40456700 | 1.19381900  |
| O | -8.92628000 | -4.29150500 | -0.08346800 |
| H | -9.08381800 | -5.16878400 | 0.29986400  |
| N | -4.12786000 | 0.97373700  | 0.40066600  |

|   |             |             |             |
|---|-------------|-------------|-------------|
| C | -3.08404400 | 1.65581100  | 0.89477300  |
| H | -4.68737200 | 1.36684200  | -0.34762600 |
| O | -2.36481100 | 1.19088000  | 1.78171400  |
| C | -2.85175100 | 3.01809000  | 0.27203000  |
| H | -2.91353800 | 2.89329300  | -0.81349000 |
| H | -3.68277400 | 3.67097200  | 0.55725800  |
| C | -1.52075300 | 3.64377400  | 0.67908300  |
| H | -0.75110000 | 2.87322400  | 0.78221900  |
| H | -1.61056600 | 4.13510500  | 1.64829200  |
| C | -1.03112400 | 4.65463400  | -0.36295500 |
| H | -1.82383200 | 5.37861500  | -0.57454500 |
| C | 0.13246800  | 5.45118700  | 0.24265900  |
| O | -0.00394600 | 6.22010500  | 1.15770700  |
| O | 1.31081400  | 5.20348600  | -0.31730000 |
| H | 1.11043000  | 4.57039300  | -1.04642800 |
| N | -0.57059700 | 3.97564200  | -1.57750400 |
| H | -0.83805700 | 2.99551600  | -1.59109700 |
| H | -0.92310800 | 4.41258500  | -2.42156300 |
| O | 0.23052400  | 0.50287200  | 1.51427900  |
| H | -0.71107700 | 0.77050300  | 1.41649800  |
| C | 4.28519300  | -0.82385800 | -0.79632000 |
| H | 4.67380400  | -1.05570900 | -1.78342200 |
| C | 5.09336200  | -0.92366500 | 0.27419500  |
| H | 4.70920800  | -0.67407400 | 1.25943100  |
| C | 6.49986800  | -1.33775900 | 0.25430300  |

|   |             |             |             |
|---|-------------|-------------|-------------|
| C | 7.20332200  | -1.30645800 | 1.46563500  |
| C | 7.14923000  | -1.75413600 | -0.91162600 |
| C | 8.54219200  | -1.68253700 | 1.50080400  |
| H | 6.70388800  | -0.98559100 | 2.37470000  |
| C | 8.48692100  | -2.12693700 | -0.85514400 |
| H | 6.64217600  | -1.80023300 | -1.86651100 |
| C | 9.19569100  | -2.09464300 | 0.34373000  |
| H | 10.24013700 | -2.38453500 | 0.39074600  |
| O | 9.27113100  | -1.66861900 | 2.64632200  |
| H | 8.72392600  | -1.36101300 | 3.37818600  |
| O | 9.06882600  | -2.52356500 | -2.01661300 |
| H | 9.99086300  | -2.75750400 | -1.85988600 |
| H | 0.38147900  | 0.20068900  | -3.02116700 |

**Geometries of H-bonded transition states in water and pentylethanoate for GS<sup>•</sup> radical and piceatannol reaction:**

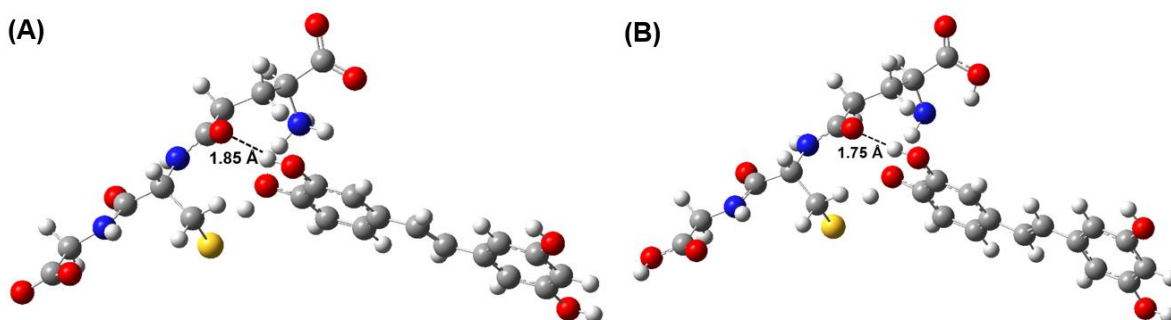

Transition states with H-bond for the reaction of GS<sup>•</sup> radical and piceatannol in (A) an aqueous and (B) a lipid medium.



Graphics of the evolution of the NPA atomic charges and Hirshfeld spin densities as functions of the IRC for the GS• radical and piceatannol reaction:

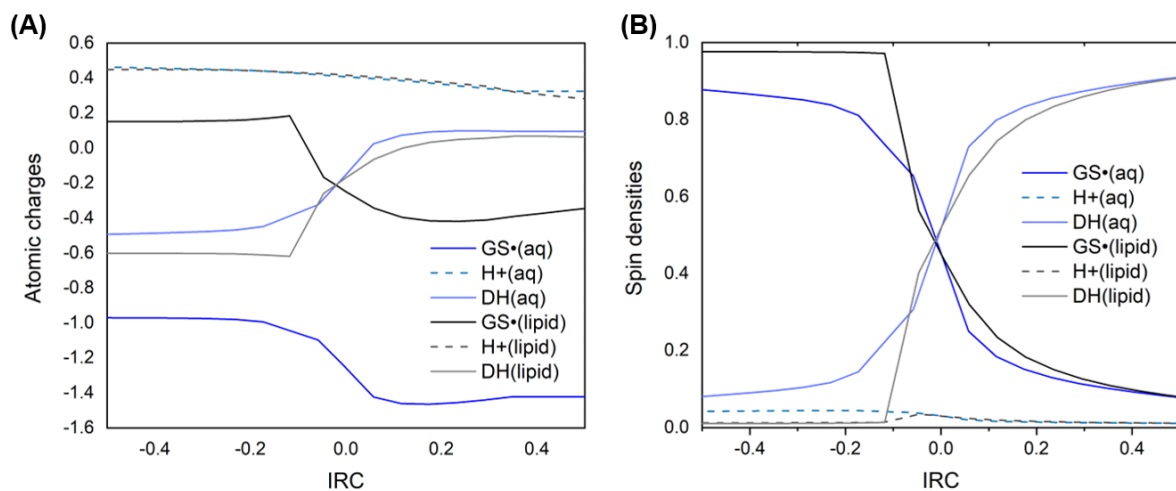

Evolution of NPA atomic charges and Hirshfeld spin densities for the H-acceptor (GS•), H-transferred (H<sup>+</sup>) and H-donor (DH=piceatannol) as functions of the intrinsic reaction coordinate (IRC) for the proton-coupled electron transfer (PCET) reaction between the GS• radical and piceatannol in aqueous (blue) and lipid (black) medium.
